# Supplementary material for: Characterization of freeze-dried oxidized human red blood cells for pre-transfusion testing by synchrotron FTIR microspectroscopy live-cell analysis
Source: Royal Society of Chemistry journal article supplement (doi:10.1039/d2an02001g), 2023-01-01
Supplement: d2an02001g1.pdf [file d2an02001g1.pdf]

## Supplementary information

### Characterization of freeze-dried oxidized human red blood cells for pre-transfusion testing by synchrotron FTIR microspectroscopy live-cell analysis

Thulya Chakkumpulakkal Puthan Veettil<sup>a#</sup>, Diana Alves<sup>b#</sup>, Jitraporn Vongsvivut<sup>c</sup>, Rosemary L Sparrow<sup>d</sup>, Bayden R. Wood<sup>a\*</sup> and Gil Garnier<sup>b\*</sup>

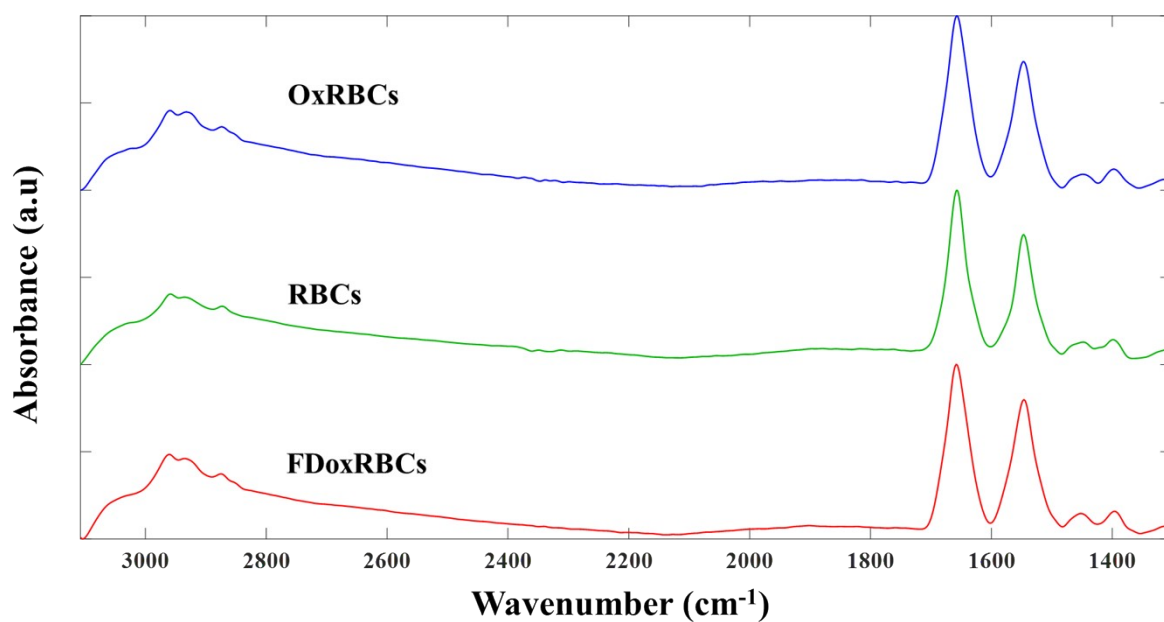

**Figure S1:** Baseline corrected averaged spectra from RBCs, OxRBCs, and FDox RBCs over 3100 – 1300 cm<sup>-1</sup> region.
